# Supplementary material
Source: MDPI journal article supplement (https://www.mdpi.com/2073-4352/13/5/836)
Supplement: s1 [file s1]

### Electronic Supplementary Information

**Table S1.** Characteristic peaks of Tos1 compared with peaks of FEB and *p*-toluenesulfonic acid.

| Absorption (cm <sup>-1</sup> ) |           |                                | Assignment (*)                   |
|--------------------------------|-----------|--------------------------------|----------------------------------|
| FEB                            | Tos1      | <i>p</i> -toluenesulfonic acid |                                  |
| -                              | 3000-2600 | -                              | N-H, amine salt                  |
| 2962                           | 2960      | -                              | O-H, carboxylic acid             |
| 2870                           | 2870      | -                              | C-H, alkanes                     |
| 2660                           | 2620      | -                              | O-H, carboxylic acid             |
| 2540                           | 2500      | -                              |                                  |
| 2231                           | 2231      | -                              | C≡N, nitrile                     |
| 1677                           | 1710      | -                              | C=O, carboxylic acid (dimer)     |
| 1603                           | 1605      | -                              | C, C stretching of aromatic ring |
| 1510                           | 1476      | -                              | C=N, thiazole                    |
| 1425                           | 1425      | -                              | S-C, thiazole                    |
| 1374                           | 1383      | -                              | C-H, alkanes (methyl)            |
| -                              | 1343-1230 | -                              | S=O stretching, sulfonate        |
| -                              | 1206      | -                              | C=O stretching, carboxylic acid  |
| 1270                           | 1252      | -                              |                                  |
| 1116                           | 1116      | -                              | C-O, ether                       |
| 1008                           | 1008      | -                              |                                  |
| -                              | -         | 1230-1140                      | S=O stretching, sulfonic acid    |

(\*) Sigma-Aldrich. Available online: <https://www.sigmaaldrich.com/RO/en/technical-documents/technicalarticle/analytical-chemistry/photometry-and-reflectometry/ir-spectrum-table> (accessed on 10.05.2023).

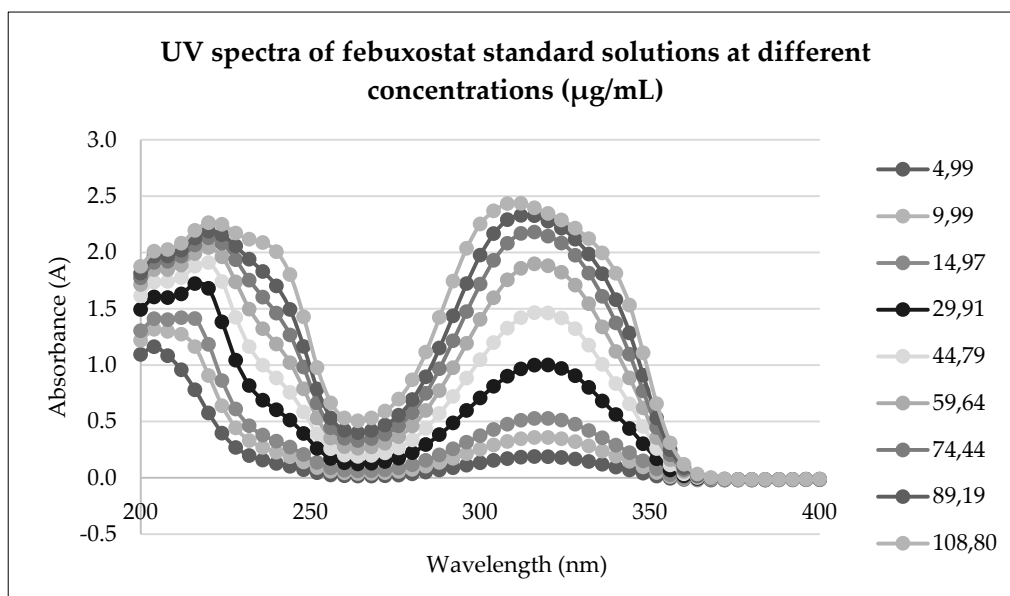

**Figure S1.** UV spectra of febuxostat standard solutions at different concentrations.

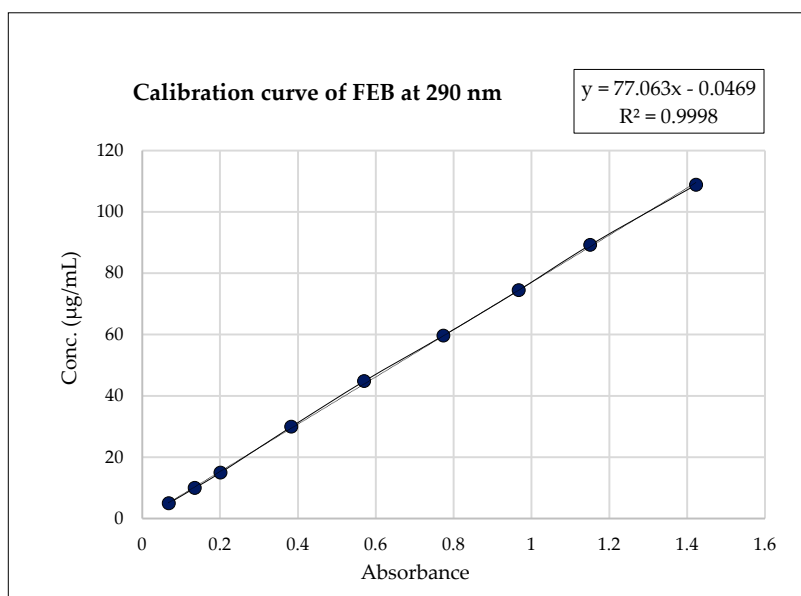

**Figure S2.** Calibration curve of febuxostat using the absorbance data at 290 nm.

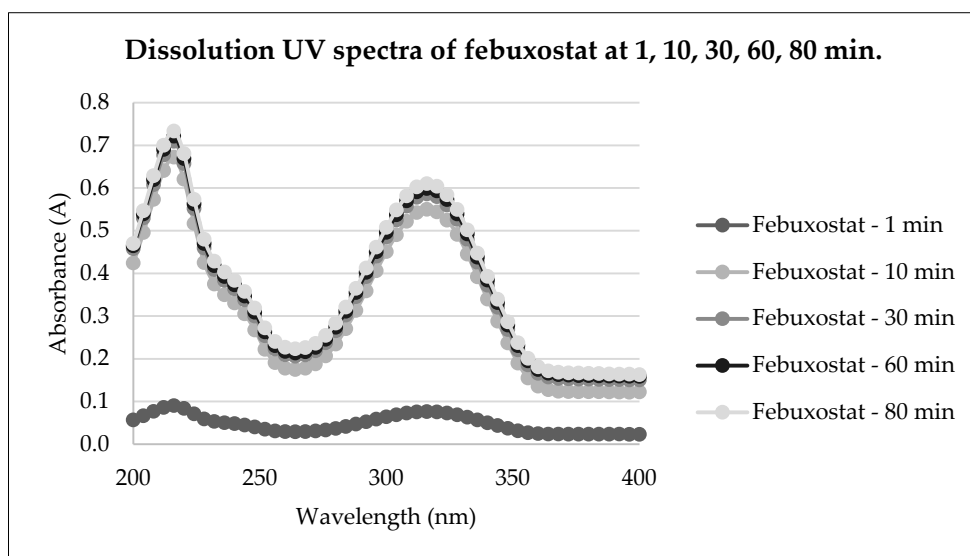

**Figure S3.** Dissolution UV spectra of febuxostat at 1, 10, 30, 60, 80 min.

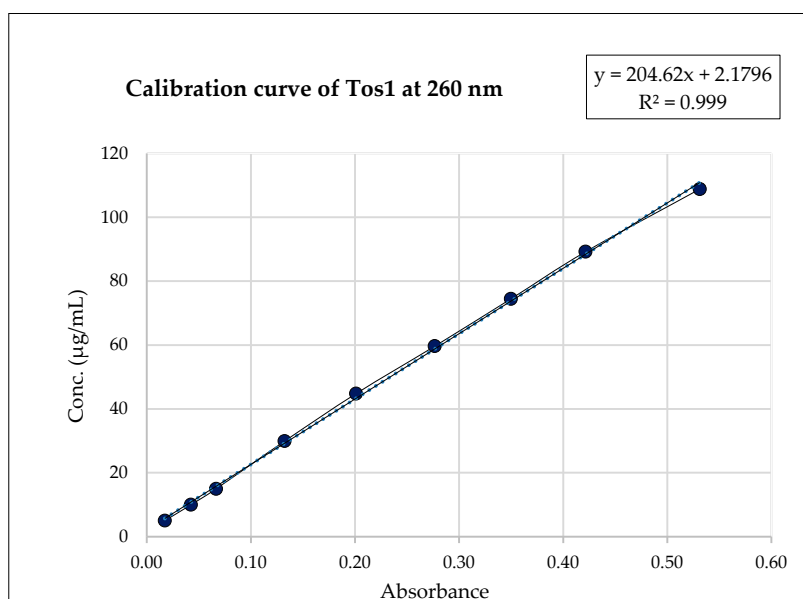

**Figure S4.** Calibration curve for Tos1 using the absorbance data at 260 nm.

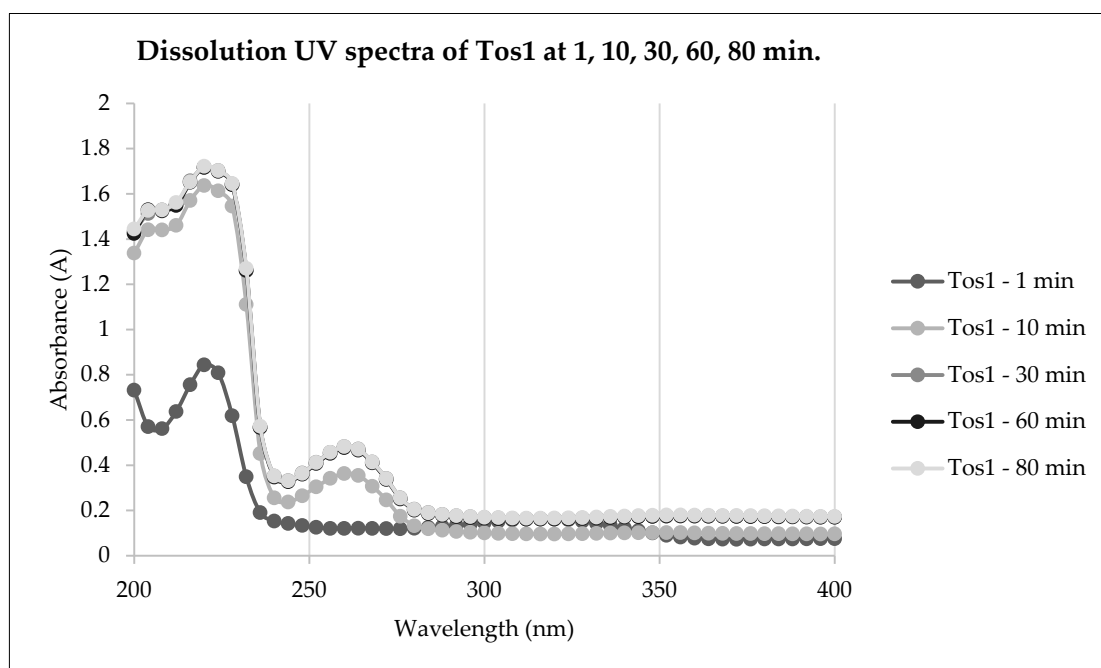

**Figure S5.** Dissolution UV spectra of Tos1 at 1, 10, 30, 60, 80 min.

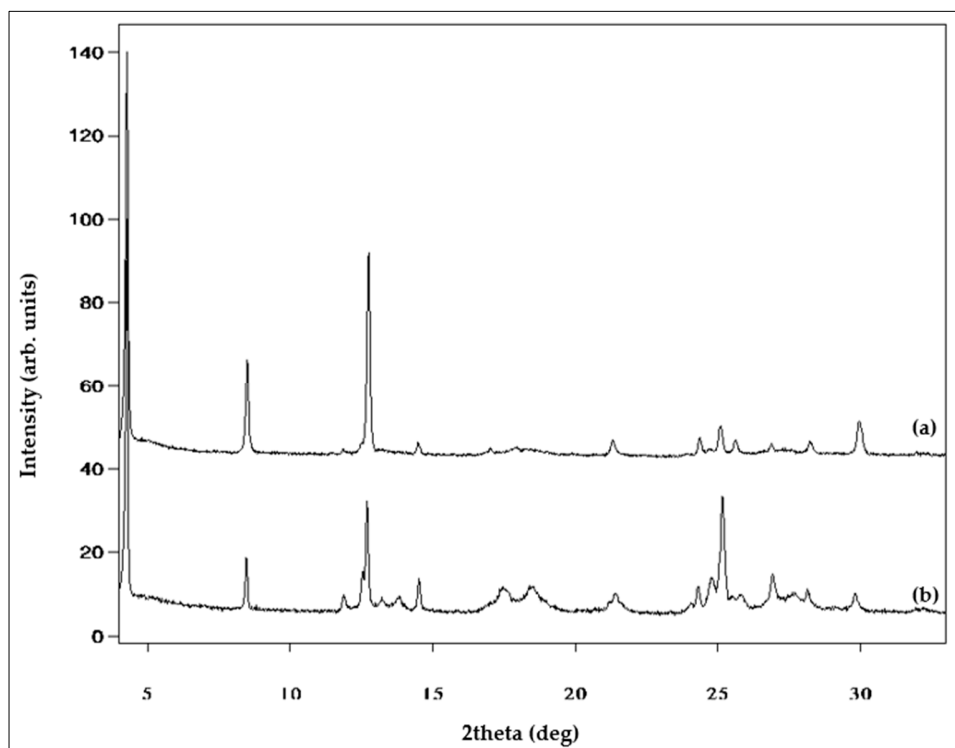

**Figure S6.** XRPD analysis of the residual solid (a) after and (b) before the dissolution experiment. A slight decrease in the intensity of the picks can be observed after the dissolution experiment.
